# Supplementary material for: Discrimination of Salvia miltiorrhiza Bunge from Different Geographical Locations Employing High-Performance Liquid Chromatography, Near-Infrared Fingerprinting Combined with Chemometrics
Source: J Anal Methods Chem. 2020 Feb 10;2020:8367619. doi: 10.1155/2020/8367619 (PMC7035550; doi:10.1155/2020/8367619)
Supplement: Supplementary Materials — The chromatograms of Salvia miltiorrhiza Bunge from different places and near-infrared (NIR) spectroscopy data of Salvia miltiorrhiza Bunge from different places. [file 8367619.f1.zip]

Archive with 2 entries (2 files):
- 8367619.f1/1.docx
- 8367619.f1/2.xlsx
