# Supplementary material for: Discrimination of Salvia miltiorrhiza Bunge from Different Geographical Locations Employing High-Performance Liquid Chromatography, Near-Infrared Fingerprinting Combined with Chemometrics
Source: J Anal Methods Chem. 2020 Feb 10;2020:8367619. doi: 10.1155/2020/8367619 (PMC7035550; doi:10.1155/2020/8367619)
Supplement: Supplementary Materials — The chromatograms of Salvia miltiorrhiza Bunge from different places and near-infrared (NIR) spectroscopy data of Salvia miltiorrhiza Bunge from different places. [file 8367619.f1.zip › 8367619.f1/2.xlsx]

## Sheet: 校正集
	1	2	3	4	5	6	7	8	9	10	11	12	13	14	15	16	17	18	19	20	21	22	23	24	25	26	27	28	29	30	31	32	33	34	35	36	37	38	39	40	41	42	43	44	45	46	47	48	49
SC-1	0.918703	0.918436	0.917626	0.917043	0.916318	0.914815	0.913127	0.911276	0.909482	0.907116	0.904427	0.900886	0.897538	0.89447	0.890924	0.887019	0.883046	0.878949	0.8749	0.870521	0.866216	0.861914	0.857892	0.853519	0.849504	0.845228	0.841167	0.836714	0.832939	0.829482	0.826092	0.822513	0.819253	0.816081	0.813144	0.810121	0.807558	0.805122	0.802982	0.800694	0.798623	0.796642	0.795101	0.793589	0.792456	0.791231	0.790319	0.7892	0.78838
SC-2	0.977	0.977	0.976	0.975	0.974	0.973	0.971	0.968	0.966	0.962	0.959	0.954	0.95	0.947	0.942	0.938	0.933	0.928	0.923	0.918	0.913	0.908	0.903	0.898	0.894	0.889	0.884	0.879	0.874	0.871	0.867	0.863	0.859	0.856	0.852	0.849	0.846	0.843	0.84	0.838	0.835	0.832	0.83	0.828	0.826	0.825	0.823	0.821	0.82
SC-3	1.11692	1.1166	1.11585	1.11524	1.11419	1.11249	1.11067	1.10851	1.1062	1.10323	1.09997	1.0959	1.09188	1.08801	1.08401	1.07953	1.07467	1.0699	1.06502	1.05984	1.05488	1.04969	1.04472	1.03948	1.03474	1.02995	1.02514	1.01986	1.0151	1.01055	1.00624	1.00178	0.997601	0.993438	0.989753	0.985966	0.982613	0.97941	0.976546	0.973508	0.970787	0.968157	0.965991	0.963747	0.961982	0.960232	0.95867	0.956892	0.955415
SC-4	1.00093	1.00075	0.999817	0.999285	0.998515	0.996739	0.994931	0.992847	0.990657	0.988068	0.984965	0.98058	0.976572	0.973313	0.969253	0.964864	0.960283	0.955828	0.951367	0.946421	0.941673	0.936941	0.932281	0.927279	0.922936	0.918491	0.913999	0.908878	0.904521	0.900684	0.896883	0.892788	0.888943	0.885326	0.881892	0.878366	0.875507	0.872714	0.870179	0.867453	0.864919	0.862452	0.860541	0.858621	0.857033	0.855388	0.853941	0.852336	0.851173
SC-5	1.02211	1.02213	1.02131	1.02094	1.01998	1.018	1.01586	1.01358	1.01121	1.0081	1.00469	0.999865	0.995159	0.991001	0.986267	0.981168	0.975772	0.970602	0.965198	0.959226	0.953397	0.947726	0.942336	0.936303	0.931046	0.925712	0.920399	0.914361	0.909106	0.90432	0.899524	0.894767	0.890337	0.885879	0.881802	0.877664	0.874153	0.870857	0.867978	0.864842	0.862125	0.859545	0.857356	0.855147	0.853421	0.85161	0.850089	0.848317	0.847086
SC-6	0.915119	0.914941	0.914032	0.913409	0.91256	0.910912	0.908989	0.906952	0.904657	0.901889	0.898834	0.895077	0.891395	0.887797	0.883758	0.879525	0.875261	0.870791	0.866162	0.86141	0.856685	0.851778	0.847168	0.84242	0.838193	0.833587	0.829019	0.824109	0.819956	0.81611	0.812278	0.808227	0.804511	0.801065	0.797852	0.794479	0.791644	0.788975	0.786651	0.784177	0.78201	0.779905	0.778123	0.77633	0.77486	0.773401	0.772057	0.770579	0.769414
SC-7	0.927462	0.927442	0.926573	0.926088	0.925437	0.924012	0.922269	0.920314	0.91818	0.915512	0.912552	0.908776	0.905009	0.901614	0.897746	0.893455	0.889109	0.884686	0.880037	0.875413	0.870712	0.86579	0.861249	0.856562	0.85239	0.847824	0.843227	0.838431	0.834181	0.830224	0.826427	0.822485	0.818673	0.814967	0.811534	0.808253	0.805417	0.802722	0.800282	0.7977	0.795512	0.793274	0.791406	0.789628	0.788096	0.786702	0.785462	0.784046	0.783008
SC-8	0.985793	0.985495	0.984343	0.983546	0.982576	0.980704	0.97864	0.976233	0.973797	0.970808	0.967429	0.963002	0.958911	0.955349	0.951195	0.946515	0.94177	0.937122	0.932238	0.92714	0.92215	0.917107	0.912445	0.907488	0.903003	0.89833	0.893663	0.888457	0.883912	0.879816	0.875782	0.871602	0.867691	0.863713	0.860176	0.856672	0.853667	0.850733	0.848097	0.845283	0.842824	0.840446	0.838502	0.836502	0.834774	0.83306	0.831586	0.829993	0.828746
SC-9	1.08028	1.08017	1.07921	1.07851	1.07779	1.0762	1.07404	1.07156	1.06933	1.06626	1.06264	1.05826	1.05418	1.05027	1.04556	1.04058	1.03554	1.03055	1.02538	1.01971	1.01422	1.00877	1.00334	0.997825	0.993056	0.987827	0.982614	0.976987	0.97212	0.96752	0.963158	0.958619	0.954446	0.950367	0.946405	0.942479	0.939237	0.936137	0.933428	0.930394	0.92774	0.925289	0.923197	0.921063	0.919321	0.917584	0.91604	0.914346	0.913138
SC-10	0.841144	0.840858	0.839854	0.839559	0.838921	0.837244	0.835397	0.833512	0.831644	0.829213	0.826514	0.822864	0.819481	0.816512	0.813036	0.809216	0.80535	0.80141	0.797113	0.792879	0.78862	0.784156	0.780003	0.775698	0.771983	0.767979	0.763984	0.759332	0.755547	0.7523	0.748922	0.745413	0.742128	0.738878	0.735813	0.732756	0.730265	0.727964	0.725915	0.723692	0.721683	0.719714	0.718192	0.71664	0.715318	0.713932	0.712849	0.711647	0.710678
SC-11	1.00361	1.00331	1.00237	1.00163	1.00071	0.999136	0.997213	0.995023	0.992975	0.990408	0.987389	0.983495	0.979959	0.976624	0.972898	0.968803	0.964437	0.959996	0.955552	0.951019	0.946426	0.941675	0.937299	0.932673	0.928561	0.924219	0.91975	0.914744	0.910433	0.906655	0.902864	0.898818	0.895013	0.891355	0.887857	0.884448	0.881646	0.878865	0.876483	0.873889	0.871355	0.868961	0.867188	0.865443	0.863824	0.862224	0.860938	0.859422	0.858321
SC-12	0.94121	0.940774	0.939649	0.939171	0.938543	0.936864	0.935006	0.933114	0.931152	0.9288	0.925845	0.92191	0.918445	0.915357	0.91163	0.907586	0.903263	0.89911	0.894789	0.890092	0.885465	0.880806	0.876462	0.871948	0.867856	0.863578	0.859175	0.8544	0.850345	0.846616	0.842929	0.839128	0.835657	0.832201	0.829009	0.825878	0.823229	0.820683	0.818498	0.816074	0.813956	0.811982	0.810358	0.808634	0.807185	0.805799	0.804659	0.803308	0.802311
SC-13	0.902719	0.902278	0.901245	0.900544	0.899675	0.898118	0.896402	0.894535	0.892556	0.890216	0.887565	0.883891	0.880588	0.877646	0.87431	0.870558	0.866438	0.862326	0.858132	0.853706	0.849182	0.84467	0.840468	0.83597	0.831867	0.827677	0.823503	0.819005	0.815074	0.811532	0.808144	0.804661	0.801508	0.798379	0.795417	0.792393	0.789803	0.787518	0.785383	0.783175	0.781214	0.779203	0.777551	0.776028	0.77479	0.773513	0.772419	0.771186	0.770351
SC-14	0.972553	0.972213	0.971345	0.970773	0.970009	0.968484	0.966515	0.964257	0.961991	0.959469	0.956371	0.95247	0.948745	0.945448	0.941687	0.937436	0.933004	0.928631	0.924397	0.919574	0.914857	0.909966	0.905393	0.900721	0.896465	0.89188	0.887467	0.882687	0.878343	0.87449	0.870742	0.866851	0.863293	0.859746	0.856393	0.85317	0.850363	0.847715	0.845389	0.842798	0.840511	0.838278	0.836542	0.83472	0.833157	0.831718	0.830355	0.82886	0.827824
SC-15	1.07146	1.07136	1.0704	1.06976	1.06914	1.06762	1.066	1.06406	1.06193	1.05932	1.05644	1.05287	1.0494	1.04622	1.04273	1.03896	1.03491	1.03081	1.02664	1.02238	1.01819	1.01374	1.00947	1.00502	1.001	0.99693	0.992824	0.988314	0.984281	0.980474	0.976789	0.973036	0.969756	0.966448	0.963325	0.960158	0.957382	0.954741	0.952449	0.949768	0.947559	0.945519	0.943702	0.941743	0.940362	0.938846	0.93765	0.936338	0.935283
SC-16	1.02634	1.02648	1.02572	1.02501	1.02407	1.02249	1.02074	1.01853	1.01629	1.0136	1.01031	1.00616	1.00222	0.998506	0.994297	0.98967	0.98485	0.980099	0.975087	0.969793	0.964719	0.959414	0.954346	0.94916	0.944423	0.939411	0.934455	0.929035	0.924348	0.92013	0.915928	0.911686	0.907913	0.904054	0.900355	0.896747	0.893711	0.890923	0.88843	0.885681	0.88318	0.880834	0.879068	0.877286	0.875689	0.874095	0.872975	0.871632	0.870589
SC-17	1.02367	1.02331	1.02268	1.02235	1.02146	1.01965	1.01786	1.01544	1.013	1.01053	1.00755	1.0033	0.999519	0.995901	0.992058	0.987689	0.983019	0.978435	0.973721	0.968693	0.963773	0.958628	0.953831	0.948907	0.944345	0.939397	0.934564	0.929362	0.924737	0.920602	0.916562	0.912225	0.908324	0.904561	0.901133	0.89761	0.894559	0.891507	0.888912	0.886208	0.88395	0.881687	0.87967	0.877693	0.876044	0.874375	0.872979	0.871391	0.87027
SC-18	0.996134	0.995872	0.995089	0.994454	0.993458	0.991695	0.99002	0.988152	0.986304	0.984006	0.98134	0.977634	0.974185	0.971322	0.96802	0.964224	0.960247	0.956277	0.952201	0.947764	0.943349	0.9389	0.934749	0.930256	0.926243	0.922102	0.918012	0.913515	0.909565	0.905968	0.902429	0.898768	0.89554	0.892259	0.889219	0.886204	0.88368	0.88125	0.878998	0.876588	0.874523	0.872532	0.871014	0.869375	0.867931	0.86651	0.865286	0.864002	0.863078
SC-19	1.0063	1.006	1.00518	1.00444	1.00343	1.00172	0.999942	0.997885	0.996057	0.993533	0.990608	0.986978	0.983593	0.980456	0.97691	0.972988	0.969074	0.9651	0.961072	0.95659	0.952073	0.947487	0.943371	0.938893	0.934786	0.930581	0.926644	0.922182	0.918168	0.914497	0.91084	0.906986	0.903416	0.900091	0.897174	0.89406	0.891181	0.888652	0.886435	0.883947	0.881735	0.879606	0.877887	0.876164	0.874704	0.873269	0.872036	0.870644	0.869542
SC-20	0.921315	0.920691	0.919854	0.91934	0.918447	0.916752	0.915093	0.913046	0.911273	0.908903	0.906183	0.902587	0.899322	0.896431	0.893113	0.889368	0.885426	0.881579	0.877697	0.873529	0.869297	0.864968	0.861041	0.856933	0.853214	0.849232	0.84534	0.840764	0.836901	0.833705	0.830387	0.826949	0.823778	0.820504	0.817571	0.814616	0.812077	0.809764	0.807709	0.805503	0.803397	0.801244	0.799681	0.798053	0.796598	0.795101	0.793928	0.792511	0.79155
SC-21	0.939356	0.939056	0.938252	0.93763	0.936748	0.93504	0.933272	0.931225	0.92923	0.926698	0.923768	0.919797	0.916349	0.913193	0.909242	0.905044	0.900896	0.896798	0.892361	0.887634	0.882983	0.878282	0.87394	0.869385	0.865376	0.861021	0.856583	0.851654	0.847484	0.843905	0.840033	0.83607	0.832509	0.829003	0.825572	0.822181	0.81942	0.816811	0.81446	0.811891	0.809596	0.807413	0.805767	0.803961	0.802402	0.80089	0.799631	0.798217	0.79712
SC-22	0.83673	0.836263	0.835184	0.834531	0.833801	0.832335	0.83069	0.82888	0.827074	0.824858	0.822355	0.819123	0.816088	0.813291	0.810123	0.806457	0.802645	0.798865	0.794849	0.790705	0.786583	0.782189	0.778194	0.773915	0.770031	0.766068	0.762224	0.75793	0.754062	0.750784	0.747671	0.744438	0.741395	0.738359	0.735693	0.733085	0.730686	0.728399	0.726426	0.724307	0.722454	0.720541	0.719091	0.717726	0.716643	0.715469	0.714514	0.713418	0.712611
HA-1	0.990238	0.989984	0.989112	0.98864	0.987931	0.986124	0.984015	0.981419	0.978587	0.975365	0.971766	0.967403	0.963393	0.95966	0.955324	0.950677	0.945844	0.940981	0.936056	0.930898	0.925825	0.920585	0.915623	0.910499	0.905781	0.901044	0.896412	0.891327	0.886955	0.882797	0.878855	0.875012	0.871487	0.86784	0.864483	0.861088	0.858061	0.855166	0.852637	0.849905	0.847484	0.845073	0.843096	0.841031	0.839275	0.837452	0.835831	0.834041	0.832731
HA-2	1.08998	1.08991	1.08895	1.08794	1.08699	1.08543	1.08333	1.0808	1.0784	1.0755	1.07212	1.06757	1.06312	1.05899	1.05446	1.04948	1.04441	1.03923	1.03391	1.02851	1.02321	1.01757	1.01224	1.00683	1.00166	0.996144	0.991129	0.985775	0.980683	0.975971	0.971531	0.966893	0.962529	0.958281	0.954443	0.950581	0.947338	0.94411	0.940975	0.937748	0.935114	0.932437	0.93017	0.927991	0.926099	0.924165	0.922631	0.920835	0.919627
HA-3	1.00909	1.00878	1.00792	1.00745	1.00673	1.00498	1.00296	1.00075	0.998489	0.995773	0.992572	0.988313	0.984235	0.980609	0.976538	0.971801	0.966912	0.96229	0.957543	0.952398	0.947154	0.941726	0.936854	0.931786	0.927126	0.922214	0.917511	0.912052	0.907391	0.903206	0.89933	0.895282	0.891257	0.887407	0.883979	0.880476	0.877439	0.87463	0.872088	0.869287	0.86666	0.86418	0.862376	0.860495	0.858912	0.85732	0.856028	0.854457	0.853276
HA-4	1.09719	1.097	1.09603	1.09551	1.09471	1.09304	1.09112	1.08879	1.08635	1.08338	1.08003	1.07554	1.07098	1.06691	1.06241	1.05745	1.05221	1.04677	1.04133	1.03574	1.03014	1.02447	1.01922	1.01347	1.00828	1.00288	0.997425	0.991485	0.98618	0.981618	0.977162	0.972181	0.967732	0.963559	0.959471	0.955228	0.951673	0.94852	0.945681	0.942545	0.939836	0.937119	0.935022	0.932952	0.931121	0.92932	0.927926	0.926324	0.925088
HA-5	0.987162	0.986908	0.98591	0.985423	0.984589	0.982699	0.98073	0.978634	0.976246	0.973377	0.970221	0.966202	0.962151	0.958407	0.954165	0.949658	0.945008	0.940317	0.93547	0.930361	0.925373	0.920225	0.91546	0.910352	0.905666	0.900841	0.895957	0.89072	0.886219	0.882124	0.878084	0.873859	0.869988	0.866097	0.862549	0.859101	0.856077	0.853091	0.850526	0.847901	0.845507	0.843225	0.841469	0.839496	0.83772	0.836046	0.834662	0.833101	0.831835
HA-6	0.943442	0.943218	0.942305	0.941693	0.940712	0.938932	0.937029	0.935071	0.93305	0.930294	0.92707	0.922985	0.919199	0.915575	0.911388	0.906971	0.902513	0.897966	0.893288	0.888216	0.883214	0.878163	0.873505	0.868483	0.863942	0.859283	0.854608	0.849427	0.845086	0.841026	0.836883	0.83264	0.828865	0.825188	0.821651	0.818059	0.815168	0.812328	0.80986	0.807079	0.804654	0.802446	0.800554	0.798577	0.796978	0.795408	0.793953	0.792381	0.791246
HA-7	0.975097	0.974649	0.97356	0.972742	0.971712	0.969666	0.967303	0.964862	0.96245	0.95929	0.955772	0.951243	0.946901	0.942951	0.938733	0.934122	0.92928	0.92425	0.919253	0.914047	0.908694	0.90337	0.898526	0.89326	0.888652	0.883794	0.879015	0.873541	0.868984	0.864991	0.860915	0.856534	0.85251	0.848527	0.844923	0.841341	0.838274	0.835378	0.832827	0.829979	0.82749	0.825108	0.823189	0.82116	0.819454	0.817731	0.816302	0.814639	0.813288
HA-8	1.05516	1.05496	1.05384	1.05328	1.05266	1.05091	1.04895	1.04661	1.04449	1.0417	1.03847	1.03405	1.02995	1.02636	1.02201	1.01725	1.01242	1.00778	1.00303	0.997628	0.992143	0.98687	0.98202	0.976856	0.972253	0.967307	0.962292	0.956683	0.95187	0.947797	0.943777	0.939391	0.935341	0.931462	0.927707	0.92401	0.920938	0.918086	0.915395	0.912399	0.909863	0.907414	0.905364	0.903383	0.901693	0.900006	0.898492	0.896947	0.895795
HA-9	0.863982	0.863724	0.862745	0.86213	0.86142	0.859884	0.857996	0.855871	0.853635	0.851176	0.848331	0.844647	0.841109	0.837795	0.834078	0.829985	0.825718	0.821625	0.81747	0.812655	0.807904	0.80333	0.799064	0.794567	0.790406	0.786035	0.781871	0.777305	0.773171	0.769581	0.766139	0.762275	0.758734	0.755443	0.75239	0.749258	0.746617	0.744141	0.741949	0.739569	0.73749	0.735527	0.73397	0.732347	0.731007	0.729669	0.728546	0.727279	0.726338
HA-10	0.951218	0.950923	0.949942	0.949298	0.948519	0.94685	0.945018	0.942891	0.940894	0.938254	0.935271	0.931535	0.928157	0.924941	0.921332	0.91716	0.912837	0.908656	0.904326	0.89968	0.895103	0.890234	0.885807	0.881222	0.877016	0.872567	0.868206	0.863457	0.859217	0.855322	0.851602	0.847488	0.843626	0.839984	0.836647	0.833214	0.830376	0.827584	0.825009	0.822357	0.820097	0.817905	0.816044	0.814205	0.812554	0.810959	0.809743	0.8084	0.807411
HA-11	0.919456	0.919191	0.918199	0.917635	0.917037	0.915539	0.913645	0.911532	0.909569	0.907206	0.904307	0.900449	0.897038	0.893952	0.890306	0.886286	0.882042	0.877842	0.873656	0.869025	0.864328	0.859726	0.855334	0.8508	0.846882	0.842566	0.838196	0.833549	0.829476	0.825784	0.822206	0.818422	0.814985	0.81157	0.808364	0.805221	0.802591	0.800084	0.79794	0.795615	0.793439	0.791297	0.789764	0.788187	0.786816	0.78548	0.784387	0.782977	0.781974
HA-12	0.912971	0.912615	0.911592	0.910816	0.909971	0.908481	0.906839	0.905061	0.903307	0.901048	0.898602	0.895426	0.892333	0.889484	0.886124	0.88252	0.878688	0.874848	0.870833	0.866533	0.862236	0.857803	0.853687	0.849286	0.845371	0.841389	0.837311	0.832844	0.829036	0.825618	0.822275	0.818824	0.815701	0.812685	0.809804	0.806868	0.804487	0.802198	0.800123	0.797911	0.796017	0.794117	0.792695	0.791279	0.790151	0.788934	0.787829	0.786566	0.785674
HA-13	0.946902	0.946486	0.945517	0.944955	0.94404	0.942348	0.940327	0.937962	0.935627	0.93264	0.929247	0.925139	0.921277	0.917639	0.913704	0.909395	0.90495	0.900485	0.895944	0.891038	0.886081	0.88105	0.876462	0.87166	0.867217	0.862616	0.858121	0.853368	0.849114	0.845269	0.841715	0.838007	0.834615	0.831303	0.828226	0.825081	0.822326	0.819758	0.817446	0.814936	0.81269	0.810609	0.808895	0.807051	0.805388	0.80375	0.802342	0.800774	0.799544
HA-14	0.988763	0.988582	0.987536	0.986705	0.985776	0.984217	0.982466	0.980428	0.978242	0.975565	0.972601	0.968736	0.964849	0.961198	0.957234	0.953072	0.948909	0.944464	0.939835	0.935	0.930396	0.925754	0.921166	0.91633	0.911965	0.907514	0.903071	0.898319	0.894129	0.890141	0.886432	0.882609	0.878936	0.875299	0.872132	0.868851	0.865862	0.863156	0.86076	0.858112	0.855764	0.853544	0.851712	0.849781	0.848219	0.846689	0.845411	0.844098	0.84312
HA-15	0.923901	0.923737	0.922951	0.922532	0.921811	0.920204	0.918387	0.916368	0.914436	0.912136	0.909354	0.905652	0.902007	0.898736	0.895142	0.890966	0.886647	0.882381	0.87789	0.873196	0.868645	0.863962	0.859383	0.854723	0.850465	0.846046	0.841671	0.836989	0.832843	0.829113	0.825329	0.821523	0.817966	0.814631	0.811623	0.808457	0.805711	0.803175	0.800872	0.798422	0.796372	0.794426	0.792784	0.791135	0.789843	0.788477	0.78727	0.785841	0.78492
HA-16	1.08333	1.08317	1.08234	1.08149	1.08068	1.07906	1.0771	1.0749	1.07291	1.07036	1.06735	1.06349	1.05986	1.05629	1.05239	1.04818	1.04394	1.0396	1.03514	1.03034	1.02565	1.02071	1.01613	1.01103	1.00658	1.00222	0.997749	0.99268	0.988453	0.984367	0.980411	0.976429	0.97264	0.968777	0.965496	0.962164	0.959174	0.956254	0.953752	0.951228	0.948897	0.946503	0.944739	0.94297	0.941413	0.939765	0.938449	0.936909	0.935759
HA-17	0.901433	0.901025	0.900019	0.899271	0.898339	0.896713	0.895002	0.893133	0.891245	0.888971	0.886473	0.883007	0.879864	0.87701	0.873731	0.869981	0.86602	0.862094	0.858057	0.85377	0.849455	0.844933	0.840641	0.836216	0.83227	0.828179	0.824099	0.819613	0.81584	0.812323	0.809024	0.805568	0.802504	0.799535	0.796625	0.793647	0.791264	0.789044	0.786991	0.784689	0.782791	0.78091	0.779461	0.778067	0.776893	0.775701	0.774701	0.773488	0.772631
HA-18	0.993591	0.993047	0.992022	0.99147	0.99063	0.988827	0.986866	0.984574	0.982369	0.979699	0.976699	0.972833	0.969307	0.9659	0.962059	0.957853	0.953485	0.949219	0.944792	0.939919	0.935219	0.930253	0.92558	0.920782	0.916477	0.911809	0.90734	0.902575	0.898243	0.894267	0.89045	0.886529	0.882849	0.879304	0.875995	0.872668	0.869882	0.867177	0.864761	0.862127	0.859841	0.857657	0.85574	0.853826	0.852436	0.85093	0.849623	0.848183	0.847117
HA-19	0.965744	0.965322	0.964428	0.96378	0.962823	0.961152	0.959462	0.957393	0.955369	0.953067	0.95042	0.946548	0.942938	0.939896	0.936393	0.932235	0.928013	0.924088	0.919798	0.915278	0.910812	0.906266	0.902006	0.897478	0.893473	0.889198	0.884919	0.880219	0.876298	0.87277	0.869229	0.865349	0.861802	0.858429	0.855289	0.852139	0.849486	0.847041	0.844884	0.842401	0.840267	0.83822	0.836552	0.834848	0.833328	0.831778	0.830581	0.829196	0.828156
HA-20	0.945521	0.945202	0.944314	0.943751	0.942867	0.941186	0.939368	0.937369	0.935461	0.932936	0.929979	0.926157	0.922761	0.919652	0.916022	0.911905	0.907612	0.903566	0.899264	0.894663	0.89007	0.885421	0.881095	0.876628	0.872628	0.868348	0.864137	0.859254	0.855083	0.851448	0.84778	0.843963	0.840384	0.836894	0.833629	0.830336	0.827625	0.824929	0.822544	0.820139	0.818045	0.815861	0.814047	0.812243	0.810689	0.809126	0.807811	0.806287	0.805256
HA-21	0.814284	0.813801	0.812818	0.812174	0.811269	0.809701	0.80818	0.806617	0.804891	0.802664	0.80029	0.797223	0.794265	0.791583	0.788488	0.78503	0.781459	0.777882	0.774017	0.770129	0.766174	0.761985	0.758091	0.754075	0.750369	0.746547	0.742903	0.738944	0.735543	0.73233	0.729215	0.726169	0.723294	0.72039	0.717762	0.715096	0.712922	0.710897	0.708976	0.70682	0.705002	0.703232	0.701828	0.700479	0.699466	0.698267	0.697233	0.696125	0.695261
HA-22	1.01871	1.01849	1.01775	1.01733	1.01606	1.01383	1.0111	1.00786	1.00437	1.0003	0.995964	0.990814	0.985982	0.981459	0.976378	0.970822	0.965097	0.959434	0.953876	0.94801	0.942187	0.936376	0.93084	0.925064	0.920038	0.914707	0.909451	0.903848	0.898959	0.894752	0.89074	0.886662	0.883049	0.879263	0.875794	0.872182	0.868996	0.865747	0.862904	0.859956	0.857507	0.854951	0.852608	0.850033	0.847765	0.845464	0.843602	0.841684	0.840167
AH-1	1.00349	1.00327	1.00212	1.00152	1.00069	0.998876	0.996814	0.99458	0.992158	0.989141	0.985831	0.981515	0.977292	0.973573	0.969458	0.964773	0.959958	0.954921	0.949817	0.944534	0.939267	0.933836	0.928825	0.923494	0.918606	0.913525	0.908466	0.903035	0.89828	0.894291	0.890123	0.885643	0.881607	0.877632	0.874027	0.870385	0.867148	0.864093	0.861524	0.858672	0.856136	0.853618	0.851668	0.849661	0.847918	0.846184	0.844789	0.843219	0.841991
AH-2	1.03436	1.03391	1.03292	1.03266	1.03189	1.02999	1.02779	1.02542	1.02292	1.01971	1.0163	1.01174	1.00745	1.00364	0.999189	0.994196	0.989171	0.984197	0.979115	0.973549	0.968022	0.962538	0.957522	0.951891	0.94688	0.941687	0.936589	0.930931	0.925982	0.921653	0.91736	0.9128	0.908588	0.904425	0.900707	0.896907	0.893529	0.890353	0.887655	0.884772	0.882174	0.879583	0.877634	0.875719	0.874039	0.872356	0.871012	0.869504	0.868319
AH-3	1.07901	1.07905	1.07813	1.07767	1.07687	1.07482	1.07296	1.07069	1.06847	1.06568	1.06201	1.05706	1.0528	1.04908	1.0445	1.03939	1.03413	1.02883	1.02334	1.01769	1.01198	1.00601	1.00071	0.995123	0.98979	0.984233	0.978999	0.972978	0.967713	0.963243	0.958598	0.953777	0.949379	0.945033	0.941042	0.937006	0.933551	0.930253	0.927407	0.92442	0.921661	0.918969	0.916922	0.91489	0.913232	0.911555	0.910105	0.908472	0.907397
AH-4	0.983252	0.983001	0.981981	0.981332	0.980603	0.978745	0.97674	0.974536	0.972253	0.969352	0.966162	0.962167	0.95826	0.954484	0.950316	0.945827	0.941301	0.936594	0.9318	0.926773	0.921776	0.916608	0.911799	0.906831	0.902292	0.89742	0.892637	0.887617	0.883192	0.878952	0.874938	0.870755	0.86677	0.862862	0.859361	0.855873	0.852886	0.850049	0.84766	0.844973	0.842504	0.840118	0.838216	0.836417	0.834804	0.83312	0.831586	0.82994	0.828676
AH-5	0.894004	0.893835	0.892983	0.892411	0.891424	0.889721	0.887922	0.885982	0.883815	0.881144	0.878267	0.87446	0.870842	0.867607	0.863715	0.859428	0.855185	0.85082	0.846182	0.841443	0.836709	0.831762	0.827207	0.822542	0.818258	0.813681	0.809143	0.804133	0.79976	0.795894	0.792129	0.78824	0.784662	0.781069	0.777678	0.774434	0.77155	0.768803	0.766356	0.763753	0.761545	0.759387	0.75754	0.755769	0.754308	0.75274	0.751441	0.750027	0.748848
AH-6	1.00117	1.00069	0.999692	0.99903	0.998007	0.996132	0.994074	0.991592	0.989278	0.986451	0.983086	0.978767	0.974855	0.971303	0.967239	0.962672	0.957973	0.95337	0.948594	0.943525	0.938579	0.933486	0.928728	0.923797	0.919346	0.91473	0.910086	0.904993	0.900562	0.896575	0.892684	0.888615	0.88487	0.881097	0.877606	0.874277	0.871535	0.86886	0.86654	0.864009	0.861674	0.859448	0.857762	0.856126	0.854678	0.853089	0.851799	0.850344	0.84918
AH-7	0.990469	0.989941	0.98882	0.988397	0.987619	0.98579	0.983997	0.982085	0.980212	0.977796	0.974935	0.970773	0.96707	0.963962	0.960228	0.956004	0.951794	0.947682	0.943287	0.938456	0.933447	0.928554	0.924083	0.919271	0.915042	0.910647	0.906228	0.901166	0.897083	0.89338	0.889567	0.885711	0.882151	0.878689	0.875443	0.872102	0.869306	0.86678	0.864411	0.861782	0.859556	0.857359	0.855672	0.853955	0.852458	0.850758	0.849365	0.848016	0.846907
AH-8	0.866378	0.86617	0.865294	0.864705	0.86392	0.862571	0.860832	0.858833	0.856889	0.85451	0.851741	0.848158	0.84468	0.841654	0.838086	0.834194	0.830174	0.826137	0.821923	0.817629	0.813359	0.808905	0.804839	0.800592	0.796665	0.792664	0.788652	0.784347	0.780499	0.777043	0.773676	0.770149	0.766808	0.763657	0.760856	0.758085	0.755575	0.753276	0.751267	0.749151	0.747259	0.745448	0.743944	0.742424	0.741243	0.739996	0.738928	0.737745	0.736978
AH-9	0.930202	0.929653	0.928674	0.928001	0.927151	0.925544	0.923644	0.921432	0.919311	0.916694	0.913838	0.91017	0.906689	0.903403	0.899728	0.895633	0.891419	0.88718	0.882813	0.878193	0.873703	0.869067	0.864646	0.860074	0.855964	0.851592	0.847234	0.842468	0.838315	0.834503	0.830659	0.826619	0.82301	0.819427	0.8161	0.812651	0.809726	0.806985	0.80462	0.802032	0.799633	0.797323	0.795486	0.79368	0.792106	0.790558	0.789286	0.787838	0.786767
AH-10	0.883989	0.883643	0.88255	0.881969	0.881333	0.879902	0.878238	0.876165	0.874089	0.871674	0.868953	0.86543	0.862093	0.85914	0.855723	0.851657	0.847502	0.843557	0.839404	0.83507	0.8307	0.826168	0.822002	0.817646	0.813685	0.809516	0.805473	0.800992	0.797161	0.793731	0.790406	0.787077	0.783921	0.780707	0.777745	0.774712	0.77218	0.769978	0.768039	0.765884	0.763934	0.762076	0.760607	0.759145	0.758042	0.756878	0.755978	0.75488	0.753996
AH-11	0.861832	0.861353	0.860237	0.859481	0.858696	0.857191	0.855417	0.853602	0.851751	0.849416	0.846789	0.843295	0.840104	0.837209	0.833783	0.82999	0.826045	0.822063	0.817914	0.813517	0.809065	0.804505	0.800302	0.795914	0.791903	0.787687	0.783546	0.779127	0.775277	0.771774	0.768356	0.764857	0.761732	0.758645	0.755697	0.752779	0.750336	0.748067	0.746043	0.743831	0.741972	0.740035	0.738497	0.737049	0.735853	0.734524	0.733438	0.732258	0.731294
AH-12	0.99523	0.99469	0.993626	0.99297	0.992344	0.990758	0.988923	0.987011	0.984963	0.982613	0.980012	0.976482	0.973104	0.969938	0.966402	0.962743	0.958969	0.954876	0.950748	0.94644	0.942115	0.937722	0.933667	0.929262	0.925392	0.921139	0.917096	0.912754	0.908998	0.905407	0.901891	0.898367	0.895072	0.891733	0.888728	0.885808	0.883273	0.880642	0.878365	0.876078	0.873919	0.871819	0.870233	0.86843	0.867084	0.865683	0.864495	0.863192	0.862288
AH-13	0.925484	0.925253	0.924393	0.923885	0.92318	0.921825	0.920234	0.91841	0.916446	0.914199	0.911485	0.907892	0.904627	0.901575	0.897971	0.893945	0.889873	0.885721	0.881383	0.876883	0.872496	0.867915	0.863634	0.859159	0.854987	0.850683	0.84656	0.842098	0.838159	0.834401	0.830814	0.827267	0.823924	0.820676	0.817763	0.81484	0.812309	0.809952	0.807845	0.805593	0.803529	0.801608	0.800182	0.798599	0.797308	0.796031	0.794991	0.793762	0.792821
AH-14	0.914099	0.913517	0.912287	0.911514	0.910631	0.908972	0.907182	0.905031	0.903088	0.900722	0.897945	0.894424	0.890979	0.887823	0.884493	0.880647	0.8765	0.872274	0.867967	0.863525	0.859017	0.854375	0.850043	0.845419	0.841228	0.836918	0.832875	0.828291	0.824279	0.820671	0.817233	0.813689	0.810438	0.807226	0.804292	0.801351	0.798825	0.796451	0.794356	0.79204	0.790049	0.788091	0.786558	0.785049	0.783768	0.782487	0.781433	0.7802	0.77923
AH-15	0.932542	0.932048	0.931071	0.930452	0.929597	0.927858	0.926011	0.923888	0.921806	0.919388	0.916607	0.912897	0.90943	0.906146	0.902555	0.89862	0.894577	0.890557	0.886299	0.881707	0.877198	0.872582	0.868309	0.863748	0.859643	0.855408	0.851179	0.846453	0.842367	0.83885	0.835362	0.831645	0.828237	0.824907	0.82179	0.818652	0.816025	0.813659	0.811494	0.809075	0.806964	0.804844	0.803188	0.801632	0.80021	0.798721	0.797485	0.796153	0.795144
AH-16	0.95055	0.950104	0.949133	0.948551	0.947695	0.946017	0.944176	0.942313	0.94039	0.937808	0.935054	0.931373	0.927917	0.924792	0.921118	0.917164	0.913128	0.909074	0.9047	0.90022	0.895807	0.891122	0.886948	0.882594	0.878663	0.874502	0.870353	0.865601	0.861648	0.85812	0.854645	0.851067	0.847821	0.844578	0.841546	0.838469	0.835952	0.833604	0.831547	0.829186	0.827092	0.825134	0.823707	0.821976	0.820518	0.819122	0.818065	0.816742	0.815739
AH-17	0.890582	0.890366	0.889351	0.888654	0.887779	0.886116	0.884485	0.88254	0.880675	0.878286	0.875488	0.871584	0.868079	0.865181	0.861645	0.857538	0.853265	0.849116	0.845061	0.840552	0.836047	0.831431	0.827176	0.822737	0.818839	0.814609	0.810337	0.805504	0.801576	0.798111	0.794541	0.790833	0.787306	0.783925	0.780843	0.777658	0.775014	0.772589	0.770361	0.767925	0.765809	0.763801	0.762172	0.760526	0.759103	0.757553	0.756341	0.755031	0.75396
AH-18	0.895087	0.894594	0.893507	0.892833	0.892079	0.890409	0.888705	0.886688	0.884707	0.882274	0.879597	0.876005	0.872612	0.869586	0.86626	0.862503	0.858476	0.854458	0.850344	0.846057	0.841703	0.837129	0.832991	0.828604	0.824722	0.820497	0.816302	0.811781	0.807957	0.804578	0.801187	0.797599	0.794339	0.791024	0.788043	0.785142	0.782659	0.780226	0.778103	0.77569	0.773501	0.771513	0.769952	0.768287	0.766836	0.765457	0.764396	0.763027	0.762027
AH-19	1.14963	1.14966	1.14892	1.14833	1.14735	1.14531	1.14297	1.13984	1.13631	1.13208	1.12802	1.12304	1.11775	1.11291	1.10808	1.10225	1.09623	1.09029	1.08433	1.07801	1.07181	1.06566	1.05994	1.05363	1.04781	1.042	1.03645	1.03033	1.02511	1.02031	1.01559	1.01078	1.00645	1.00204	0.997959	0.993679	0.989916	0.986334	0.983125	0.979474	0.976479	0.973597	0.970967	0.968261	0.965836	0.963271	0.96123	0.959211	0.957615
AH-20	1.17331	1.17313	1.17232	1.1717	1.17088	1.169	1.16705	1.16504	1.16271	1.15959	1.15623	1.15199	1.14773	1.1437	1.13955	1.13473	1.13015	1.12568	1.12084	1.11547	1.11034	1.10509	1.10031	1.09517	1.09032	1.08515	1.08013	1.07477	1.07017	1.06571	1.06142	1.05697	1.05287	1.04855	1.04478	1.04112	1.03781	1.03426	1.0313	1.02798	1.02519	1.0226	1.0203	1.01798	1.01596	1.01389	1.01233	1.01056	1.00922
AH-21	1.08067	1.08036	1.07953	1.07913	1.07837	1.07671	1.07469	1.07247	1.07002	1.06714	1.06396	1.05959	1.05573	1.05204	1.04771	1.04297	1.03827	1.03364	1.0289	1.02397	1.01897	1.01375	1.00902	1.00399	0.999345	0.994485	0.989732	0.984662	0.980155	0.976047	0.972024	0.967651	0.963727	0.959944	0.956433	0.952711	0.949568	0.946483	0.943762	0.940898	0.938418	0.93604	0.93397	0.931933	0.930297	0.928538	0.92733	0.925908	0.924772
AH-22	0.925998	0.926156	0.925411	0.924831	0.923975	0.922328	0.92029	0.917999	0.915663	0.91281	0.909373	0.905129	0.900975	0.896902	0.892432	0.887633	0.882708	0.877681	0.872535	0.86717	0.861806	0.856268	0.851154	0.845763	0.840719	0.835548	0.830365	0.824841	0.820191	0.815758	0.811204	0.806638	0.80252	0.798529	0.794685	0.790928	0.78771	0.78464	0.781852	0.77888	0.776426	0.774119	0.772081	0.770079	0.768362	0.766669	0.765236	0.763752	0.762609
AH-23	0.932614	0.932593	0.931796	0.931287	0.93024	0.928505	0.92663	0.924372	0.921795	0.918728	0.915186	0.911053	0.906861	0.902916	0.898563	0.893675	0.888755	0.883861	0.878856	0.873597	0.868435	0.863069	0.857979	0.852853	0.848003	0.842888	0.837944	0.83273	0.828119	0.823793	0.819516	0.815199	0.811156	0.80726	0.803731	0.800229	0.797033	0.794067	0.791569	0.78889	0.786601	0.78429	0.78224	0.780311	0.778739	0.777018	0.77559	0.773988	0.772736
SD-1	1.00865	1.00841	1.00771	1.0071	1.00616	1.00438	1.00226	0.999874	0.997255	0.99433	0.991012	0.986513	0.982074	0.977897	0.973359	0.968639	0.963524	0.958223	0.95301	0.947535	0.942143	0.936437	0.931081	0.925552	0.920352	0.915057	0.909995	0.904289	0.899304	0.894751	0.890283	0.885601	0.881281	0.876989	0.873152	0.869398	0.866009	0.862744	0.859871	0.856824	0.854258	0.851753	0.849782	0.847767	0.845991	0.844243	0.842863	0.841395	0.840244
SD-2	1.16159	1.16091	1.15984	1.15891	1.15792	1.15611	1.1539	1.15147	1.14891	1.14601	1.14296	1.13883	1.13471	1.13109	1.12717	1.1226	1.11814	1.11353	1.10874	1.10409	1.0995	1.09468	1.0902	1.0854	1.08118	1.07648	1.0718	1.0668	1.06258	1.05872	1.05478	1.05051	1.04649	1.04251	1.03891	1.03531	1.03233	1.02923	1.02646	1.02352	1.02078	1.01824	1.01628	1.01402	1.01215	1.01042	1.00869	1.00689	1.00536
SD-3	1.15748	1.15686	1.15598	1.15533	1.15435	1.15284	1.15109	1.14851	1.146	1.14295	1.1398	1.13556	1.13128	1.1274	1.12329	1.11864	1.11394	1.10914	1.10389	1.09864	1.09374	1.08837	1.08363	1.07851	1.07351	1.0683	1.0633	1.05794	1.0532	1.04873	1.04467	1.04016	1.03581	1.03184	1.02827	1.02449	1.02126	1.01802	1.01524	1.01212	1.00944	1.00687	1.00475	1.00257	1.00076	0.998823	0.997105	0.995349	0.994009
SD-4	1.08892	1.08845	1.08735	1.08652	1.08572	1.08386	1.08171	1.07931	1.07723	1.07452	1.07134	1.06724	1.06347	1.05985	1.05609	1.05176	1.04728	1.04258	1.03765	1.03286	1.02821	1.02316	1.01861	1.01392	1.00955	1.00474	1.00011	0.995107	0.990748	0.986598	0.982633	0.978394	0.974505	0.970695	0.967025	0.963503	0.960713	0.957798	0.9552	0.952308	0.94977	0.947491	0.945594	0.943639	0.942096	0.940272	0.938796	0.937305	0.935981
SD-5	0.854031	0.853624	0.852622	0.851845	0.850993	0.849354	0.84745	0.845339	0.843302	0.840938	0.838102	0.834388	0.830961	0.827848	0.824332	0.820558	0.81646	0.812355	0.808208	0.803871	0.799526	0.795157	0.791165	0.786771	0.782933	0.778829	0.774775	0.770163	0.766249	0.762805	0.759352	0.755501	0.751981	0.748508	0.745328	0.742139	0.739453	0.736787	0.734441	0.731964	0.729777	0.727603	0.725824	0.724095	0.722664	0.721214	0.72006	0.718749	0.717735
SD-6	0.89126	0.890907	0.889854	0.889294	0.888621	0.886976	0.885095	0.883047	0.880953	0.878411	0.875501	0.871623	0.86805	0.864905	0.861249	0.857216	0.853037	0.848777	0.844475	0.839962	0.835548	0.830988	0.826683	0.822105	0.818178	0.813915	0.809717	0.805104	0.801238	0.797766	0.794228	0.790499	0.787092	0.783746	0.7807	0.77772	0.775083	0.772587	0.770448	0.768114	0.766152	0.764247	0.762753	0.7612	0.759944	0.758581	0.757533	0.756363	0.755495
SD-7	0.845936	0.84563	0.844511	0.8439	0.843103	0.841375	0.839554	0.837621	0.835603	0.833049	0.830279	0.826411	0.822797	0.819633	0.815874	0.811757	0.807486	0.803187	0.79877	0.793999	0.789166	0.784321	0.779871	0.775166	0.770903	0.766314	0.76187	0.757037	0.752977	0.749434	0.745884	0.742093	0.738652	0.735291	0.732156	0.729089	0.726448	0.724071	0.721909	0.719495	0.717401	0.715393	0.713993	0.712532	0.711214	0.709872	0.708802	0.707548	0.706686
SD-8	0.912775	0.912419	0.911428	0.910901	0.909969	0.908156	0.906204	0.903936	0.901677	0.898856	0.895606	0.891335	0.887337	0.883861	0.879671	0.875244	0.87072	0.866153	0.86142	0.856426	0.851431	0.846368	0.84175	0.836931	0.832655	0.827948	0.82319	0.818071	0.81385	0.810186	0.806465	0.802408	0.798821	0.795236	0.79184	0.788509	0.785749	0.783184	0.780752	0.778143	0.776	0.773929	0.772221	0.770385	0.768823	0.76726	0.765928	0.764432	0.763372
SD-9	1.10598	1.1058	1.10467	1.1037	1.10235	1.10043	1.09821	1.09543	1.09262	1.08936	1.0858	1.08082	1.07603	1.07178	1.06715	1.06177	1.05655	1.05148	1.04618	1.0402	1.03422	1.02843	1.02313	1.01731	1.01205	1.00659	1.00117	0.995131	0.990078	0.985459	0.981007	0.976076	0.971449	0.967102	0.963129	0.959081	0.955636	0.952283	0.949198	0.945811	0.942698	0.939906	0.937645	0.935298	0.933365	0.931344	0.929672	0.927735	0.92635
SD-10	0.923065	0.922774	0.921831	0.921328	0.920451	0.918687	0.916764	0.914865	0.913118	0.910674	0.907782	0.903808	0.900249	0.897106	0.893301	0.889088	0.884767	0.88041	0.875843	0.871122	0.866204	0.861281	0.856914	0.852114	0.847756	0.843143	0.838641	0.833713	0.829574	0.825903	0.822114	0.818261	0.814639	0.81105	0.807836	0.804666	0.801978	0.799399	0.797018	0.794556	0.792487	0.790393	0.788689	0.786985	0.785648	0.784253	0.783059	0.781833	0.780896
SD-11	1.01336	1.01311	1.01195	1.01144	1.01043	1.0084	1.00638	1.0042	1.00179	0.998785	0.99554	0.99113	0.986694	0.98308	0.978833	0.97378	0.968847	0.964121	0.958904	0.953341	0.948011	0.942597	0.93756	0.93214	0.927219	0.922049	0.917011	0.911514	0.90691	0.902502	0.89806	0.893469	0.88937	0.885348	0.881578	0.877801	0.874728	0.871704	0.869029	0.866169	0.863717	0.861278	0.859376	0.857405	0.855783	0.854062	0.852583	0.851082	0.849994
SD-12	0.934837	0.934376	0.933175	0.932463	0.931664	0.929966	0.927993	0.925752	0.923891	0.921505	0.918518	0.914617	0.911119	0.908045	0.904306	0.900079	0.895935	0.891754	0.887197	0.882423	0.877677	0.872895	0.868607	0.863837	0.859567	0.855101	0.85074	0.845788	0.841701	0.838238	0.834691	0.83074	0.827324	0.824039	0.820853	0.817614	0.814996	0.812478	0.810282	0.807845	0.805717	0.80373	0.802142	0.800414	0.798985	0.797662	0.796595	0.795325	0.794383
SD-13	0.924463	0.923954	0.922925	0.922341	0.921445	0.919716	0.917711	0.915632	0.913571	0.910794	0.907633	0.903525	0.899777	0.896517	0.892632	0.888323	0.883896	0.87958	0.875033	0.870115	0.865104	0.85999	0.855409	0.850601	0.846394	0.84184	0.837295	0.832075	0.827758	0.823982	0.820259	0.816327	0.812678	0.809098	0.805719	0.802415	0.79965	0.797012	0.794634	0.792167	0.790037	0.787912	0.786155	0.784444	0.783082	0.781571	0.780346	0.779	0.778057
SD-14	1.06227	1.0617	1.06038	1.05964	1.05865	1.05673	1.05464	1.05218	1.05005	1.04724	1.04391	1.03947	1.03541	1.03183	1.02774	1.02314	1.01852	1.01405	1.00921	1.00409	0.999024	0.993884	0.989121	0.983989	0.979604	0.97459	0.969696	0.964355	0.959958	0.95606	0.951975	0.947639	0.943641	0.939733	0.936248	0.932658	0.929559	0.926647	0.923838	0.920837	0.918287	0.915704	0.913682	0.911623	0.90996	0.908175	0.906649	0.90506	0.903826
SD-15	1.06439	1.06408	1.06286	1.06204	1.06115	1.05937	1.05736	1.05493	1.05281	1.04999	1.04679	1.04232	1.03846	1.03515	1.03101	1.02643	1.02181	1.01717	1.01235	1.00727	1.00217	0.996884	0.992006	0.987022	0.982549	0.97763	0.972842	0.967433	0.962808	0.958635	0.954575	0.950206	0.94619	0.942264	0.938457	0.934599	0.93145	0.928467	0.925662	0.922707	0.920169	0.917685	0.915639	0.913626	0.911974	0.910212	0.908634	0.90693	0.905816
SD-16	1.0063	1.006	1.00518	1.00444	1.00343	1.00172	0.999942	0.997885	0.996057	0.993533	0.990608	0.986978	0.983593	0.980456	0.97691	0.972988	0.969074	0.9651	0.961072	0.95659	0.952073	0.947487	0.943371	0.938893	0.934786	0.930581	0.926644	0.922182	0.918168	0.914497	0.91084	0.906986	0.903416	0.900091	0.897174	0.89406	0.891181	0.888652	0.886435	0.883947	0.881735	0.879606	0.877887	0.876164	0.874704	0.873269	0.872036	0.870644	0.869542
SD-17	0.977	0.977	0.976	0.975	0.974	0.973	0.971	0.968	0.966	0.962	0.959	0.954	0.95	0.947	0.942	0.938	0.933	0.928	0.923	0.918	0.913	0.908	0.903	0.898	0.894	0.889	0.884	0.879	0.874	0.871	0.867	0.863	0.859	0.856	0.852	0.849	0.846	0.843	0.84	0.838	0.835	0.832	0.83	0.828	0.826	0.825	0.823	0.821	0.82
SD-18	1.02211	1.02213	1.02131	1.02094	1.01998	1.018	1.01586	1.01358	1.01121	1.0081	1.00469	0.999865	0.995159	0.991001	0.986267	0.981168	0.975772	0.970602	0.965198	0.959226	0.953397	0.947726	0.942336	0.936303	0.931046	0.925712	0.920399	0.914361	0.909106	0.90432	0.899524	0.894767	0.890337	0.885879	0.881802	0.877664	0.874153	0.870857	0.867978	0.864842	0.862125	0.859545	0.857356	0.855147	0.853421	0.85161	0.850089	0.848317	0.847086
SD-19	0.985793	0.985495	0.984343	0.983546	0.982576	0.980704	0.97864	0.976233	0.973797	0.970808	0.967429	0.963002	0.958911	0.955349	0.951195	0.946515	0.94177	0.937122	0.932238	0.92714	0.92215	0.917107	0.912445	0.907488	0.903003	0.89833	0.893663	0.888457	0.883912	0.879816	0.875782	0.871602	0.867691	0.863713	0.860176	0.856672	0.853667	0.850733	0.848097	0.845283	0.842824	0.840446	0.838502	0.836502	0.834774	0.83306	0.831586	0.829993	0.828746
SD-20	0.841144	0.840858	0.839854	0.839559	0.838921	0.837244	0.835397	0.833512	0.831644	0.829213	0.826514	0.822864	0.819481	0.816512	0.813036	0.809216	0.80535	0.80141	0.797113	0.792879	0.78862	0.784156	0.780003	0.775698	0.771983	0.767979	0.763984	0.759332	0.755547	0.7523	0.748922	0.745413	0.742128	0.738878	0.735813	0.732756	0.730265	0.727964	0.725915	0.723692	0.721683	0.719714	0.718192	0.71664	0.715318	0.713932	0.712849	0.711647	0.710678
SD-21	0.94121	0.940774	0.939649	0.939171	0.938543	0.936864	0.935006	0.933114	0.931152	0.9288	0.925845	0.92191	0.918445	0.915357	0.91163	0.907586	0.903263	0.89911	0.894789	0.890092	0.885465	0.880806	0.876462	0.871948	0.867856	0.863578	0.859175	0.8544	0.850345	0.846616	0.842929	0.839128	0.835657	0.832201	0.829009	0.825878	0.823229	0.820683	0.818498	0.816074	0.813956	0.811982	0.810358	0.808634	0.807185	0.805799	0.804659	0.803308	0.802311
SD-22	1.07146	1.07136	1.0704	1.06976	1.06914	1.06762	1.066	1.06406	1.06193	1.05932	1.05644	1.05287	1.0494	1.04622	1.04273	1.03896	1.03491	1.03081	1.02664	1.02238	1.01819	1.01374	1.00947	1.00502	1.001	0.99693	0.992824	0.988314	0.984281	0.980474	0.976789	0.973036	0.969756	0.966448	0.963325	0.960158	0.957382	0.954741	0.952449	0.949768	0.947559	0.945519	0.943702	0.941743	0.940362	0.938846	0.93765	0.936338	0.935283
SD-23	1.02367	1.02331	1.02268	1.02235	1.02146	1.01965	1.01786	1.01544	1.013	1.01053	1.00755	1.0033	0.999519	0.995901	0.992058	0.987689	0.983019	0.978435	0.973721	0.968693	0.963773	0.958628	0.953831	0.948907	0.944345	0.939397	0.934564	0.929362	0.924737	0.920602	0.916562	0.912225	0.908324	0.904561	0.901133	0.89761	0.894559	0.891507	0.888912	0.886208	0.88395	0.881687	0.87967	0.877693	0.876044	0.874375	0.872979	0.871391	0.87027
[truncated: 1,508 more columns]

## Sheet: 验证
	1	2
SC-1	0.814284	0.813801	0.812818	0.812174	0.811269	0.809701	0.80818	0.806617	0.804891	0.802664	0.80029	0.797223	0.794265	0.791583	0.788488	0.78503	0.781459	0.777882	0.774017	0.770129	0.766174	0.761985	0.758091	0.754075	0.750369	0.746547	0.742903	0.738944	0.735543	0.73233	0.729215	0.726169	0.723294	0.72039	0.717762	0.715096	0.712922	0.710897	0.708976	0.70682	0.705002	0.703232	0.701828	0.700479	0.699466	0.698267	0.697233	0.696125	0.695261
SC-2	1.01871	1.01849	1.01775	1.01733	1.01606	1.01383	1.0111	1.00786	1.00437	1.0003	0.995964	0.990814	0.985982	0.981459	0.976378	0.970822	0.965097	0.959434	0.953876	0.94801	0.942187	0.936376	0.93084	0.925064	0.920038	0.914707	0.909451	0.903848	0.898959	0.894752	0.89074	0.886662	0.883049	0.879263	0.875794	0.872182	0.868996	0.865747	0.862904	0.859956	0.857507	0.854951	0.852608	0.850033	0.847765	0.845464	0.843602	0.841684	0.840167
SC-3	1.00349	1.00327	1.00212	1.00152	1.00069	0.998876	0.996814	0.99458	0.992158	0.989141	0.985831	0.981515	0.977292	0.973573	0.969458	0.964773	0.959958	0.954921	0.949817	0.944534	0.939267	0.933836	0.928825	0.923494	0.918606	0.913525	0.908466	0.903035	0.89828	0.894291	0.890123	0.885643	0.881607	0.877632	0.874027	0.870385	0.867148	0.864093	0.861524	0.858672	0.856136	0.853618	0.851668	0.849661	0.847918	0.846184	0.844789	0.843219	0.841991
SC-4	1.03436	1.03391	1.03292	1.03266	1.03189	1.02999	1.02779	1.02542	1.02292	1.01971	1.0163	1.01174	1.00745	1.00364	0.999189	0.994196	0.989171	0.984197	0.979115	0.973549	0.968022	0.962538	0.957522	0.951891	0.94688	0.941687	0.936589	0.930931	0.925982	0.921653	0.91736	0.9128	0.908588	0.904425	0.900707	0.896907	0.893529	0.890353	0.887655	0.884772	0.882174	0.879583	0.877634	0.875719	0.874039	0.872356	0.871012	0.869504	0.868319
SC-5	1.07901	1.07905	1.07813	1.07767	1.07687	1.07482	1.07296	1.07069	1.06847	1.06568	1.06201	1.05706	1.0528	1.04908	1.0445	1.03939	1.03413	1.02883	1.02334	1.01769	1.01198	1.00601	1.00071	0.995123	0.98979	0.984233	0.978999	0.972978	0.967713	0.963243	0.958598	0.953777	0.949379	0.945033	0.941042	0.937006	0.933551	0.930253	0.927407	0.92442	0.921661	0.918969	0.916922	0.91489	0.913232	0.911555	0.910105	0.908472	0.907397
SC-6	0.983252	0.983001	0.981981	0.981332	0.980603	0.978745	0.97674	0.974536	0.972253	0.969352	0.966162	0.962167	0.95826	0.954484	0.950316	0.945827	0.941301	0.936594	0.9318	0.926773	0.921776	0.916608	0.911799	0.906831	0.902292	0.89742	0.892637	0.887617	0.883192	0.878952	0.874938	0.870755	0.86677	0.862862	0.859361	0.855873	0.852886	0.850049	0.84766	0.844973	0.842504	0.840118	0.838216	0.836417	0.834804	0.83312	0.831586	0.82994	0.828676
SC-7	0.894004	0.893835	0.892983	0.892411	0.891424	0.889721	0.887922	0.885982	0.883815	0.881144	0.878267	0.87446	0.870842	0.867607	0.863715	0.859428	0.855185	0.85082	0.846182	0.841443	0.836709	0.831762	0.827207	0.822542	0.818258	0.813681	0.809143	0.804133	0.79976	0.795894	0.792129	0.78824	0.784662	0.781069	0.777678	0.774434	0.77155	0.768803	0.766356	0.763753	0.761545	0.759387	0.75754	0.755769	0.754308	0.75274	0.751441	0.750027	0.748848
SC-8	1.00117	1.00069	0.999692	0.99903	0.998007	0.996132	0.994074	0.991592	0.989278	0.986451	0.983086	0.978767	0.974855	0.971303	0.967239	0.962672	0.957973	0.95337	0.948594	0.943525	0.938579	0.933486	0.928728	0.923797	0.919346	0.91473	0.910086	0.904993	0.900562	0.896575	0.892684	0.888615	0.88487	0.881097	0.877606	0.874277	0.871535	0.86886	0.86654	0.864009	0.861674	0.859448	0.857762	0.856126	0.854678	0.853089	0.851799	0.850344	0.84918
HA-1	0.990469	0.989941	0.98882	0.988397	0.987619	0.98579	0.983997	0.982085	0.980212	0.977796	0.974935	0.970773	0.96707	0.963962	0.960228	0.956004	0.951794	0.947682	0.943287	0.938456	0.933447	0.928554	0.924083	0.919271	0.915042	0.910647	0.906228	0.901166	0.897083	0.89338	0.889567	0.885711	0.882151	0.878689	0.875443	0.872102	0.869306	0.86678	0.864411	0.861782	0.859556	0.857359	0.855672	0.853955	0.852458	0.850758	0.849365	0.848016	0.846907
HA-2	0.866378	0.86617	0.865294	0.864705	0.86392	0.862571	0.860832	0.858833	0.856889	0.85451	0.851741	0.848158	0.84468	0.841654	0.838086	0.834194	0.830174	0.826137	0.821923	0.817629	0.813359	0.808905	0.804839	0.800592	0.796665	0.792664	0.788652	0.784347	0.780499	0.777043	0.773676	0.770149	0.766808	0.763657	0.760856	0.758085	0.755575	0.753276	0.751267	0.749151	0.747259	0.745448	0.743944	0.742424	0.741243	0.739996	0.738928	0.737745	0.736978
HA-3	0.930202	0.929653	0.928674	0.928001	0.927151	0.925544	0.923644	0.921432	0.919311	0.916694	0.913838	0.91017	0.906689	0.903403	0.899728	0.895633	0.891419	0.88718	0.882813	0.878193	0.873703	0.869067	0.864646	0.860074	0.855964	0.851592	0.847234	0.842468	0.838315	0.834503	0.830659	0.826619	0.82301	0.819427	0.8161	0.812651	0.809726	0.806985	0.80462	0.802032	0.799633	0.797323	0.795486	0.79368	0.792106	0.790558	0.789286	0.787838	0.786767
HA-4	0.883989	0.883643	0.88255	0.881969	0.881333	0.879902	0.878238	0.876165	0.874089	0.871674	0.868953	0.86543	0.862093	0.85914	0.855723	0.851657	0.847502	0.843557	0.839404	0.83507	0.8307	0.826168	0.822002	0.817646	0.813685	0.809516	0.805473	0.800992	0.797161	0.793731	0.790406	0.787077	0.783921	0.780707	0.777745	0.774712	0.77218	0.769978	0.768039	0.765884	0.763934	0.762076	0.760607	0.759145	0.758042	0.756878	0.755978	0.75488	0.753996
HA-5	0.861832	0.861353	0.860237	0.859481	0.858696	0.857191	0.855417	0.853602	0.851751	0.849416	0.846789	0.843295	0.840104	0.837209	0.833783	0.82999	0.826045	0.822063	0.817914	0.813517	0.809065	0.804505	0.800302	0.795914	0.791903	0.787687	0.783546	0.779127	0.775277	0.771774	0.768356	0.764857	0.761732	0.758645	0.755697	0.752779	0.750336	0.748067	0.746043	0.743831	0.741972	0.740035	0.738497	0.737049	0.735853	0.734524	0.733438	0.732258	0.731294
HA-6	0.99523	0.99469	0.993626	0.99297	0.992344	0.990758	0.988923	0.987011	0.984963	0.982613	0.980012	0.976482	0.973104	0.969938	0.966402	0.962743	0.958969	0.954876	0.950748	0.94644	0.942115	0.937722	0.933667	0.929262	0.925392	0.921139	0.917096	0.912754	0.908998	0.905407	0.901891	0.898367	0.895072	0.891733	0.888728	0.885808	0.883273	0.880642	0.878365	0.876078	0.873919	0.871819	0.870233	0.86843	0.867084	0.865683	0.864495	0.863192	0.862288
HA-7	0.925484	0.925253	0.924393	0.923885	0.92318	0.921825	0.920234	0.91841	0.916446	0.914199	0.911485	0.907892	0.904627	0.901575	0.897971	0.893945	0.889873	0.885721	0.881383	0.876883	0.872496	0.867915	0.863634	0.859159	0.854987	0.850683	0.84656	0.842098	0.838159	0.834401	0.830814	0.827267	0.823924	0.820676	0.817763	0.81484	0.812309	0.809952	0.807845	0.805593	0.803529	0.801608	0.800182	0.798599	0.797308	0.796031	0.794991	0.793762	0.792821
HA-8	0.914099	0.913517	0.912287	0.911514	0.910631	0.908972	0.907182	0.905031	0.903088	0.900722	0.897945	0.894424	0.890979	0.887823	0.884493	0.880647	0.8765	0.872274	0.867967	0.863525	0.859017	0.854375	0.850043	0.845419	0.841228	0.836918	0.832875	0.828291	0.824279	0.820671	0.817233	0.813689	0.810438	0.807226	0.804292	0.801351	0.798825	0.796451	0.794356	0.79204	0.790049	0.788091	0.786558	0.785049	0.783768	0.782487	0.781433	0.7802	0.77923
AH-1	0.932542	0.932048	0.931071	0.930452	0.929597	0.927858	0.926011	0.923888	0.921806	0.919388	0.916607	0.912897	0.90943	0.906146	0.902555	0.89862	0.894577	0.890557	0.886299	0.881707	0.877198	0.872582	0.868309	0.863748	0.859643	0.855408	0.851179	0.846453	0.842367	0.83885	0.835362	0.831645	0.828237	0.824907	0.82179	0.818652	0.816025	0.813659	0.811494	0.809075	0.806964	0.804844	0.803188	0.801632	0.80021	0.798721	0.797485	0.796153	0.795144
AH-2	0.95055	0.950104	0.949133	0.948551	0.947695	0.946017	0.944176	0.942313	0.94039	0.937808	0.935054	0.931373	0.927917	0.924792	0.921118	0.917164	0.913128	0.909074	0.9047	0.90022	0.895807	0.891122	0.886948	0.882594	0.878663	0.874502	0.870353	0.865601	0.861648	0.85812	0.854645	0.851067	0.847821	0.844578	0.841546	0.838469	0.835952	0.833604	0.831547	0.829186	0.827092	0.825134	0.823707	0.821976	0.820518	0.819122	0.818065	0.816742	0.815739
AH-3	0.890582	0.890366	0.889351	0.888654	0.887779	0.886116	0.884485	0.88254	0.880675	0.878286	0.875488	0.871584	0.868079	0.865181	0.861645	0.857538	0.853265	0.849116	0.845061	0.840552	0.836047	0.831431	0.827176	0.822737	0.818839	0.814609	0.810337	0.805504	0.801576	0.798111	0.794541	0.790833	0.787306	0.783925	0.780843	0.777658	0.775014	0.772589	0.770361	0.767925	0.765809	0.763801	0.762172	0.760526	0.759103	0.757553	0.756341	0.755031	0.75396
AH-4	0.83673	0.836263	0.835184	0.834531	0.833801	0.832335	0.83069	0.82888	0.827074	0.824858	0.822355	0.819123	0.816088	0.813291	0.810123	0.806457	0.802645	0.798865	0.794849	0.790705	0.786583	0.782189	0.778194	0.773915	0.770031	0.766068	0.762224	0.75793	0.754062	0.750784	0.747671	0.744438	0.741395	0.738359	0.735693	0.733085	0.730686	0.728399	0.726426	0.724307	0.722454	0.720541	0.719091	0.717726	0.716643	0.715469	0.714514	0.713418	0.712611
AH-5	0.990238	0.989984	0.989112	0.98864	0.987931	0.986124	0.984015	0.981419	0.978587	0.975365	0.971766	0.967403	0.963393	0.95966	0.955324	0.950677	0.945844	0.940981	0.936056	0.930898	0.925825	0.920585	0.915623	0.910499	0.905781	0.901044	0.896412	0.891327	0.886955	0.882797	0.878855	0.875012	0.871487	0.86784	0.864483	0.861088	0.858061	0.855166	0.852637	0.849905	0.847484	0.845073	0.843096	0.841031	0.839275	0.837452	0.835831	0.834041	0.832731
AH-6	0.999909	0.999739	0.999026	0.998524	0.997367	0.995487	0.992915	0.989796	0.986377	0.98249	0.978319	0.973429	0.968871	0.964604	0.959841	0.954813	0.949567	0.944285	0.93897	0.933345	0.927764	0.92228	0.917264	0.912046	0.907293	0.902405	0.897765	0.892768	0.888413	0.88475	0.881223	0.877689	0.874628	0.871557	0.868698	0.865639	0.862983	0.860494	0.858404	0.856024	0.853913	0.851854	0.850069	0.847978	0.846026	0.843907	0.84215	0.840373	0.839006
AH-7	1.08998	1.08991	1.08895	1.08794	1.08699	1.08543	1.08333	1.0808	1.0784	1.0755	1.07212	1.06757	1.06312	1.05899	1.05446	1.04948	1.04441	1.03923	1.03391	1.02851	1.02321	1.01757	1.01224	1.00683	1.00166	0.996144	0.991129	0.985775	0.980683	0.975971	0.971531	0.966893	0.962529	0.958281	0.954443	0.950581	0.947338	0.94411	0.940975	0.937748	0.935114	0.932437	0.93017	0.927991	0.926099	0.924165	0.922631	0.920835	0.919627
SD-1	1.00909	1.00878	1.00792	1.00745	1.00673	1.00498	1.00296	1.00075	0.998489	0.995773	0.992572	0.988313	0.984235	0.980609	0.976538	0.971801	0.966912	0.96229	0.957543	0.952398	0.947154	0.941726	0.936854	0.931786	0.927126	0.922214	0.917511	0.912052	0.907391	0.903206	0.89933	0.895282	0.891257	0.887407	0.883979	0.880476	0.877439	0.87463	0.872088	0.869287	0.86666	0.86418	0.862376	0.860495	0.858912	0.85732	0.856028	0.854457	0.853276
SD-2	1.09719	1.097	1.09603	1.09551	1.09471	1.09304	1.09112	1.08879	1.08635	1.08338	1.08003	1.07554	1.07098	1.06691	1.06241	1.05745	1.05221	1.04677	1.04133	1.03574	1.03014	1.02447	1.01922	1.01347	1.00828	1.00288	0.997425	0.991485	0.98618	0.981618	0.977162	0.972181	0.967732	0.963559	0.959471	0.955228	0.951673	0.94852	0.945681	0.942545	0.939836	0.937119	0.935022	0.932952	0.931121	0.92932	0.927926	0.926324	0.925088
SD-3	0.987162	0.986908	0.98591	0.985423	0.984589	0.982699	0.98073	0.978634	0.976246	0.973377	0.970221	0.966202	0.962151	0.958407	0.954165	0.949658	0.945008	0.940317	0.93547	0.930361	0.925373	0.920225	0.91546	0.910352	0.905666	0.900841	0.895957	0.89072	0.886219	0.882124	0.878084	0.873859	0.869988	0.866097	0.862549	0.859101	0.856077	0.853091	0.850526	0.847901	0.845507	0.843225	0.841469	0.839496	0.83772	0.836046	0.834662	0.833101	0.831835
SD-4	0.943442	0.943218	0.942305	0.941693	0.940712	0.938932	0.937029	0.935071	0.93305	0.930294	0.92707	0.922985	0.919199	0.915575	0.911388	0.906971	0.902513	0.897966	0.893288	0.888216	0.883214	0.878163	0.873505	0.868483	0.863942	0.859283	0.854608	0.849427	0.845086	0.841026	0.836883	0.83264	0.828865	0.825188	0.821651	0.818059	0.815168	0.812328	0.80986	0.807079	0.804654	0.802446	0.800554	0.798577	0.796978	0.795408	0.793953	0.792381	0.791246
SD-5	0.975097	0.974649	0.97356	0.972742	0.971712	0.969666	0.967303	0.964862	0.96245	0.95929	0.955772	0.951243	0.946901	0.942951	0.938733	0.934122	0.92928	0.92425	0.919253	0.914047	0.908694	0.90337	0.898526	0.89326	0.888652	0.883794	0.879015	0.873541	0.868984	0.864991	0.860915	0.856534	0.85251	0.848527	0.844923	0.841341	0.838274	0.835378	0.832827	0.829979	0.82749	0.825108	0.823189	0.82116	0.819454	0.817731	0.816302	0.814639	0.813288
SD-6	1.12101	1.12081	1.11991	1.11941	1.11864	1.11664	1.11399	1.11077	1.1075	1.10351	1.0992	1.094	1.08917	1.08461	1.07954	1.07418	1.06864	1.06314	1.05722	1.05143	1.04567	1.03967	1.03421	1.02849	1.02354	1.0184	1.0131	1.00734	1.00253	0.998564	0.99464	0.990714	0.987098	0.983487	0.980101	0.976563	0.973471	0.970407	0.967854	0.964916	0.962232	0.959675	0.957566	0.955138	0.953053	0.9508	0.948968	0.946892	0.945364
SD-7	1.05516	1.05496	1.05384	1.05328	1.05266	1.05091	1.04895	1.04661	1.04449	1.0417	1.03847	1.03405	1.02995	1.02636	1.02201	1.01725	1.01242	1.00778	1.00303	0.997628	0.992143	0.98687	0.98202	0.976856	0.972253	0.967307	0.962292	0.956683	0.95187	0.947797	0.943777	0.939391	0.935341	0.931462	0.927707	0.92401	0.920938	0.918086	0.915395	0.912399	0.909863	0.907414	0.905364	0.903383	0.901693	0.900006	0.898492	0.896947	0.895795
[truncated: 1,508 more columns]
